# Supplementary material for: Spatial Patterns and Determinants of Endemic Taxa Richness in the Genus Viburnum (Adoxaceae) in China
Source: MDPI journal article supplement (doi:10.3390/d14090744), 2022-09-10
Supplement: s1 [file s1]

## Supplementary Materials

**Table S1.** Checklist of endemic species of the genus *Viburnum* in China, with their endangered status, and AUC values for species distribution model results. NT: Near Threatened; VU: Vulnerable; EN: Endangered; CR: Critically Endangered; NE: Not Evaluated; RS: Rare species. DD: Data Deficient.

| Checklist of Endemic Taxa of <i>Viburnum</i> L. (Adoxaceae) in China |              |                                                                               |                | Conservation            |              | Species Distribution Model (MaxEnt) |       |
|----------------------------------------------------------------------|--------------|-------------------------------------------------------------------------------|----------------|-------------------------|--------------|-------------------------------------|-------|
| Section Groups                                                       | Chinese Name | Species Name                                                                  | Altitude Range | Current IUCN Categories | Rare species | Number of Records                   | AUC   |
| 裸芽组<br>Sect. <i>Viburnum</i>                                         | 醉鱼草状荚蒾       | <i>V. buddleifolium</i> C. H. Wright                                          | 0~2000 m       | NE                      | RS           | 36                                  | 0.989 |
|                                                                      | 金佛山荚蒾        | <i>V. chinshanense</i> Graebner                                               | 0~2000 m       | NE                      | NA           | 101                                 | 0.973 |
|                                                                      | 密花荚蒾         | <i>V. congestum</i> Rehder                                                    | 500~3000 m     | NE                      | NA           | 99                                  | 0.970 |
|                                                                      | 壮大荚蒾         | <i>V. glomeratum</i> D. Don subsp. <i>magnificum</i> (P. S. Hsu) P. S. Hsu    | 0~1500 m       | NE                      | NA           | 21                                  | 0.969 |
|                                                                      | 圆叶荚蒾         | <i>V. glomeratum</i> D. Don subsp. <i>rotundifolium</i> (P. S. Hsu) P. S. Hsu | 2000~3500 m    | NE                      | RS           | 3                                   | NA    |
|                                                                      | 绣球荚蒾         | <i>V. Macrocephalum</i> Fortune f. <i>macrocephalum</i>                       | 0~1000 m       | NE                      | RS           | 1                                   | NA    |
|                                                                      | 琼花           | <i>V. Macrocephalum</i> Fortune f. <i>keteleeri</i> (Carrière) Rehder         | 0~1000 m       | NE                      | NA           | 41                                  | 0.972 |
|                                                                      | 皱叶荚蒾         | <i>V. rhytidophyllum</i> Hemsley                                              | 0~2500 m       | NE                      | NA           | 238                                 | 0.968 |
|                                                                      | 陕西荚蒾         | <i>V. schensianum</i> Maximowicz                                              | 0~3500 m       | NE                      | NA           | 356                                 | 0.959 |
|                                                                      | 烟管荚蒾         | <i>V. utile</i> Hemsley                                                       | 0~2000 m       | NE                      | NA           | 524                                 | 0.955 |
| 合轴组<br>Sect. <i>Pseudotinus</i> C. B. Clarke                         | 合轴荚蒾         | <i>V. sympodiale</i> Graebner                                                 | 500~3500 m     | NE                      | NA           | 163                                 | 0.952 |
| 球核组<br>Sect. <i>Tinus</i> (Miller) C. B. Clarke                      | 樟叶荚蒾         | <i>V. cinnamomifolium</i> Rehder                                              | 500~2500 m     | NE                      | NA           | 83                                  | 0.978 |
|                                                                      | 川西荚蒾         | <i>V. davidii</i> Franchet                                                    | 1000~3500 m    | NE                      | RS           | 26                                  | 0.994 |
|                                                                      | 毛枝荚蒾         | <i>V. atrocyaneum</i> C. B. Clarke f. <i>harryanum</i> (Rehder) P.S. Hsu      | 1000~3000 m    | NE                      | NA           | 20                                  | 0.976 |
|                                                                      | 狭叶球核荚蒾       | <i>V. Propinquum</i> Hemsley var. <i>mairei</i> W. W. Smith                   | 0~1000 m       | NE                      | NA           | 51                                  | 0.959 |
|                                                                      | 三脉叶荚蒾        | <i>V. triplinerve</i> Handel-Mazzetti                                         | 0~1000 m       | VU                      | RS           | 67                                  | 0.985 |
| 圆锥组<br>Sect. <i>Solenotinus</i> Candolle                             | 短序荚蒾         | <i>V. brachybotryum</i> Hemsley                                               | 0~2000 m       | NE                      | NA           | 169                                 | 0.963 |
|                                                                      | 短筒荚蒾         | <i>V. brevitubum</i> (P. S. Hsu) P. S. Hsu                                    | 1000~3000 m    | NE                      | NA           | 23                                  | 0.953 |
|                                                                      | 漾濞荚蒾         | <i>V. chingii</i> P. S. Hsu var. <i>chingii</i>                               | 1500~3000 m    | NE                      | NA           | 72                                  | 0.983 |
|                                                                      | 伞房荚蒾         | <i>V. corymbiflorum</i> P. S. Hsu subsp. <i>corymbiflorum</i>                 | 500~3500 m     | NE                      | NA           | 150                                 | 0.958 |
|                                                                      | 苹果叶荚蒾        | <i>V. corymbiflorum</i> P. S. Hsu subsp. <i>malifolium</i> P. S. Hsu          | 1500~2500 m    | DD                      | RS           | 9                                   | 0.992 |

|                                                           |         |                                                                                                    |             |    |    |      |       |
|-----------------------------------------------------------|---------|----------------------------------------------------------------------------------------------------|-------------|----|----|------|-------|
|                                                           | 香荚蒾     | <i>V. farreri</i> Stearn                                                                           | 1500~3000 m | NE | NA | 24   | 0.878 |
|                                                           | 巴东荚蒾    | <i>V. henryi</i> Hemsley                                                                           | 500~3000 m  | NE | NA | 195  | 0.969 |
|                                                           | 长梗荚蒾    | <i>V. longipedunculatum</i> (P. S. Hsu) P. S. Hsu                                                  | 1000~2000 m | NE | NA | 7    | 0.933 |
|                                                           | 台湾珊瑚树   | <i>V. Odoratissimum</i> Ker Gawler var. <i>arboricola</i> (Hayata) Yamamoto                        | 1500~2500 m | NE | RS | 1    | NA    |
|                                                           | 少花荚蒾    | <i>V. oliganthum</i> Batalin                                                                       | 500~2500 m  | NE | NA | 302  | 0.964 |
|                                                           | 峨眉荚蒾    | <i>V. omeiense</i> P. S. Hsu                                                                       | 1000~1500 m | CR | RS | 2    | NA    |
|                                                           | 台东荚蒾    | <i>V. taitoense</i> Hayata                                                                         | 500~2500 m  | NE | RS | 46   | 0.985 |
|                                                           | 腾越荚蒾    | <i>V. tengyuehense</i> (W. W. Smith) P. S. Hsu var. <i>tengyuehense</i>                            | 1000~3000 m | NE | NA | 17   | 0.973 |
|                                                           | 多脉腾越荚蒾  | <i>V. tengyuehense</i> (W. W. Smith) P. S. Hsu var. <i>polyneurum</i> (P. S. Hsu) P. S. Hsu        | 2000~2500 m | NT | RS | 1    | NA    |
|                                                           | 横脉荚蒾    | <i>V. trabeculosum</i> C. Y. Wu ex P. S. Hsu                                                       | 1500~2500 m | VU | RS | 10   | 0.998 |
|                                                           | 云南荚蒾    | <i>V. yunnanense</i> Rehder                                                                        | 2000~3000 m | EN | RS | 5    | 0.974 |
| 蝶花组<br>Sect. <i>Tomentosa</i><br>(Maximowicz)<br>Nakai    | 蝶花荚蒾    | <i>V. hanceanum</i> Maximowicz                                                                     | 0~1000 m    | NE | NA | 133  | 0.975 |
|                                                           | 台湾蝴蝶戏珠花 | <i>V. plicatum</i> Thunberg var. <i>formosanum</i> Y. C. Liu & C. H. Ou                            | 1500~3000 m | NE | RS | 6    | 0.997 |
| 大叶组<br>Sect. <i>Megalotinus</i><br>(Maximowicz)<br>Rehder | 广叶荚蒾    | <i>V. amplifolium</i> Rehder                                                                       | 1000~2000 m | NE | RS | 21   | 0.995 |
|                                                           | 侧花荚蒾    | <i>V. laterale</i> Rehder                                                                          | 500~1000 m  | NE | RS | 1    | NA    |
|                                                           | 光果荚蒾    | <i>V. leiocarpum</i> P. S. Hsu var. <i>leiocarpum</i>                                              | 1000~2000 m | NE | NA | 14   | 0.993 |
|                                                           | 斑点光果荚蒾  | <i>V. leiocarpum</i> P. S. Hsu var. <i>punctatum</i> P. S. Hsu                                     | 1000~2500 m | NE | RS | 22   | 0.998 |
|                                                           | 大果鳞斑荚蒾  | <i>V. punctatum</i> Buchanan-Hamilton ex D. Don var. <i>lepidotulum</i> (Merrill & Chun) P. S. Hsu | 0~1500 m    | NE | NA | 56   | 0.987 |
|                                                           | 三叶荚蒾    | <i>V. ternatum</i> Rehder                                                                          | 0~1500 m    | NE | NA | 108  | 0.969 |
| 齿叶组<br>Sect. <i>Odontotinus</i><br>Rehder                 | 桦叶荚蒾    | <i>V. betulifolium</i> Batalin                                                                     | 0~4000 m    | NE | NA | 1265 | 0.912 |
|                                                           | 金腺荚蒾    | <i>V. chunii</i> P. S. Hsu                                                                         | 0~2000 m    | NE | NA | 103  | 0.973 |
|                                                           | 粤赣荚蒾    | <i>V. dalzielii</i> W. W. Smith                                                                    | 0~1500 m    | NE | NA | 24   | 0.974 |
|                                                           | 直角荚蒾    | <i>V. foetidum</i> Wallich var. <i>rectangulatum</i> (Graebner) Rehder                             | 500~3000 m  | NE | NA | 192  | 0.959 |
|                                                           | 珍珠荚蒾    | <i>V. foetidum</i> Wallich var. <i>ceanothoides</i> (C. H. Wright) Handel-Mazzetti                 | 500~3000 m  | EN | RS | 203  | 0.969 |
|                                                           | 南方荚蒾    | <i>V. fordiae</i> Hance                                                                            | 0~1500 m    | NE | NA | 918  | 0.937 |
|                                                           | 台中荚蒾    | <i>V. formosanum</i> (Hance) Hayata var. <i>formosanum</i>                                         | 0~2000 m    | NE | RS | 23   | 0.998 |

|        |                                                                          |             |    |    |     |       |
|--------|--------------------------------------------------------------------------|-------------|----|----|-----|-------|
| 毛枝台中莢蒾 | <i>V. formosanum</i> (Hance) Hayata<br>var. <i>pubigerum</i> P. S. Hsu   | 0~1500 m    | NE | NA | 50  | 0.980 |
| 光萼莢蒾   | <i>V. formosanum</i> (Hance) Hayata<br>subsp. <i>leiogynum</i> P. S. Hsu | 0~2500 m    | NE | NA | 59  | 0.979 |
| 衡山莢蒾   | <i>V. hengshanicum</i> Tsiang ex P. S. Hsu                               | 500~1500 m  | NE | NA | 41  | 0.980 |
| 全葉莢蒾   | <i>V. integrifolium</i> Hayata                                           | 1500~2000 m | NE | RS | 8   | 0.996 |
| 甘肅莢蒾   | <i>V. kansuense</i> Batalin                                              | 2000~4000 m | VU | RS | 120 | 0.974 |
| 披針形莢蒾  | <i>V. lancifolium</i> P. S. Hsu                                          | 0~1000 m    | NE | NA | 53  | 0.990 |
| 長傘梗莢蒾  | <i>V. longiradiatum</i> P. S. Hsu & S. W. Fan                            | 500~3000 m  | NT | RS | 38  | 0.990 |
| 黑果莢蒾   | <i>V. melanocarpum</i> P. S. Hsu                                         | 500~1500 m  | NT | RS | 35  | 0.988 |
| 小葉莢蒾   | <i>V. parvifolium</i> Hayata                                             | 2500~3500 m | NE | RS | 3   | NA    |
| 常綠莢蒾   | <i>V. sempervirens</i> K. Koch var. <i>sempervirens</i>                  | 0~2000 m    | NE | NA | 221 | 0.973 |
| 具毛常綠莢蒾 | <i>V. sempervirens</i> K. Koch var. <i>trichophorum</i> Handel-Mazzetti  | 0~1500 m    | NE | NA | 146 | 0.964 |
| 茶莢蒾    | <i>V. setigerum</i> Hance                                                | 0~2000 m    | NE | NA | 386 | 0.946 |
| 瑤山莢蒾   | <i>V. squamulosum</i> P. S. Hsu                                          | 500~1000 m  | DD | RS | 4   | NA    |
| 夙陽山莢蒾  | <i>V. fengyangshanense</i> Z. H. Chen, P. L. Chiu & L. X. Ye             | 1000~2000 m | NE | RS | 3   | NA    |

**Table S2.** Spearman's rank correlation coefficients for 8 bio-climate predictors (spearman's rho < 0.80). BIO2 = Mean Diurnal Range, BIO3 = Isothermality (BIO2/BIO7) ( $\times 100$ ), BIO4 = Temperature Seasonality (standard deviation  $\times 100$ ), BIO10 = Mean Temperature of Warmest Quarter, BIO11 = Mean Temperature of Coldest Quarter, BIO15 = Precipitation Seasonality (Coefficient of Variation), BIO19 = Precipitation of Coldest Quarter.

|       | Bio2 | Bio3   | Bio4    | Bio10   | Bio11   | Bio15   | Bio18   | Bio19   |
|-------|------|--------|---------|---------|---------|---------|---------|---------|
| bio2  | 1    | 0.3062 | 0.3883  | -0.4943 | -0.6677 | 0.5899  | -0.7062 | -0.7322 |
| bio3  |      | 1      | -0.7187 | -0.4854 | 0.2107  | 0.2374  | 0.0951  | -0.1252 |
| bio4  |      |        | 1       | 0.1394  | -0.6841 | 0.2155  | -0.4875 | -0.406  |
| bio10 |      |        |         | 1       | 0.6267  | -0.4593 | 0.3371  | 0.4298  |
| bio11 |      |        |         |         | 1       | -0.5084 | 0.6321  | 0.6381  |
| bio15 |      |        |         |         |         | 1       | -0.256  | -0.6269 |
| bio18 |      |        |         |         |         |         | 1       | 0.6186  |
| bio19 |      |        |         |         |         |         |         | 1       |

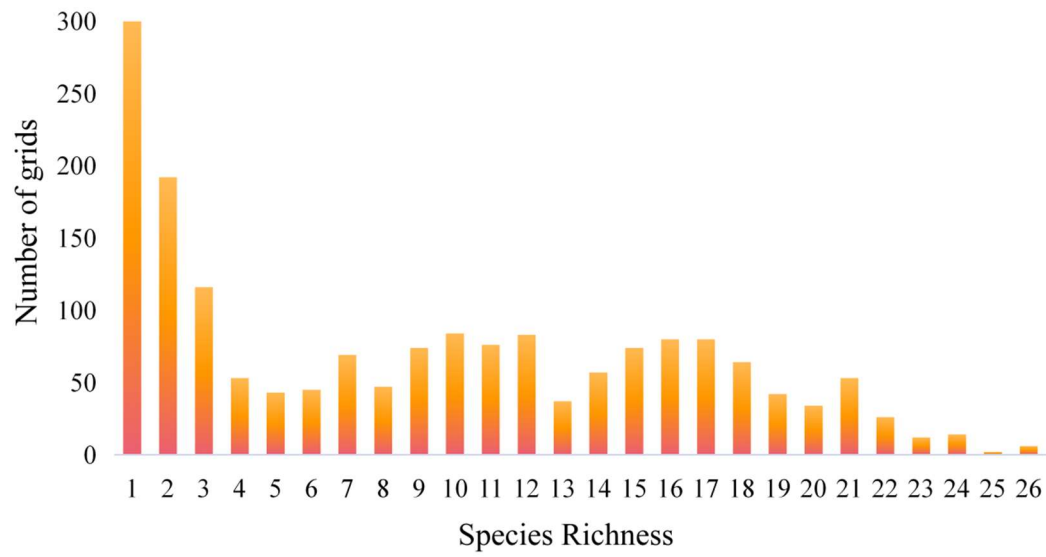

**Figure S1.** Frequency distribution of endemic richness of genus *Viburnum* in China within the 50 × 50 km grids.

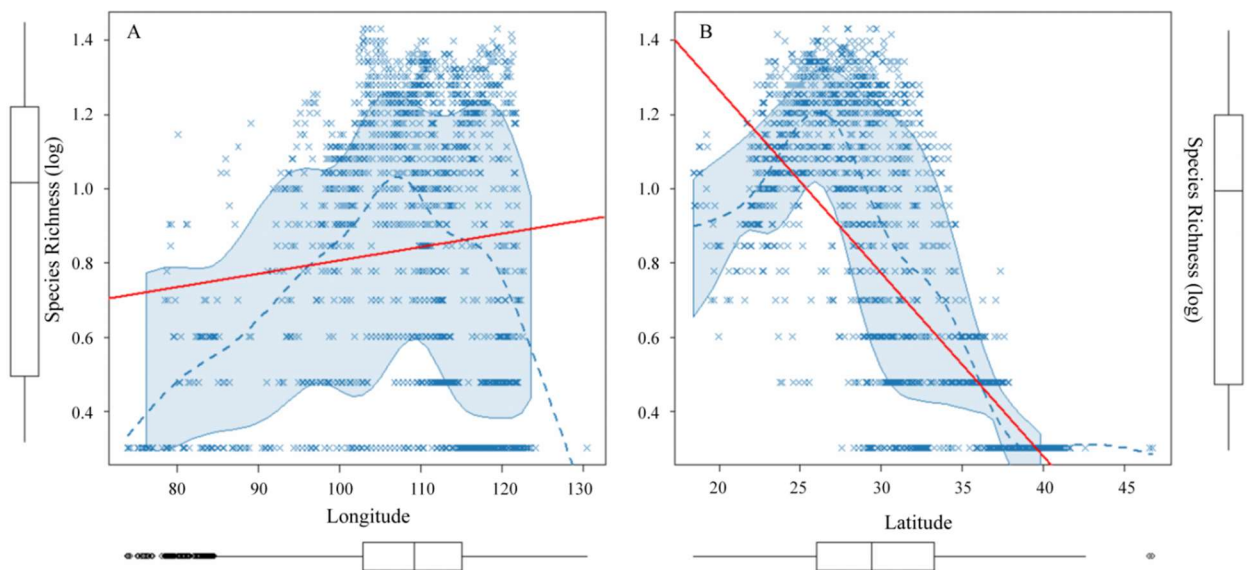

**Figure S2.** Correlation between the endemic richness of genus *Viburnum* and longitude (A) and latitude (B) in China.

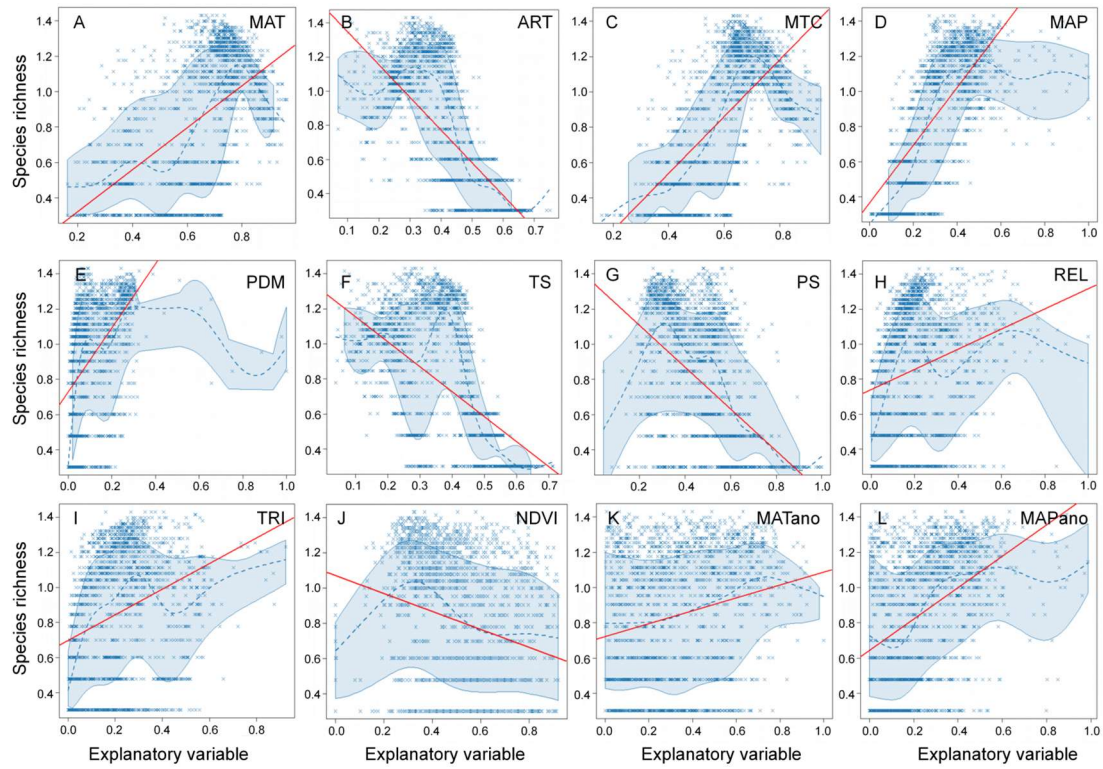

**Figure S3.** Linear relationships between explanatory variables and endemic richness of genus *Viburnum*. (A) Mean annual temperature (MAT); (B) Annual range of temperature (ART); (C) Mean temperature of the coldest quarter (MTC); (D) Mean annual precipitation (MAP); (E) Mean precipitation of the driest month (PDM); (F) temperature seasonality (TS); (G) Precipitation seasonality (PS); (H) The range in elevation of each grid cell (maximum minus minimum elevation, REL); (I) Terrain ruggedness index (TRI); (J) Normalized difference vegetation index (NDVI); (K) MAT change since the Last Glacial Maximum (MATano); (L) MAP change since the Last Glacial Maximum (MAPano).

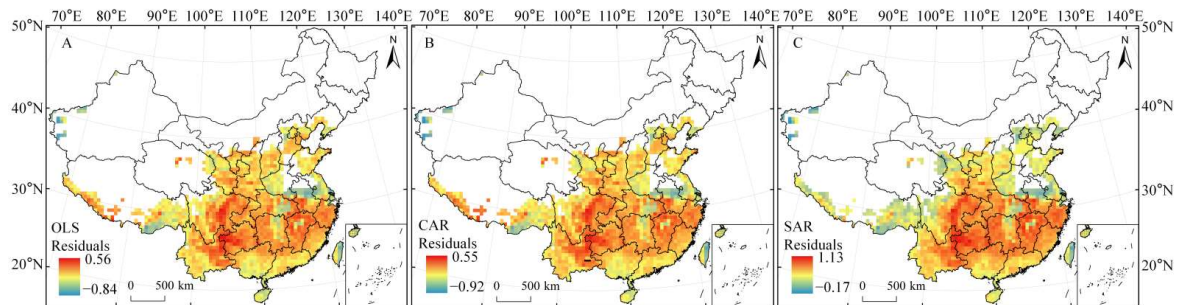

**Figure S4.** Geographic distribution of residuals for the three model tests for endemic richness of genus *Viburnum* in China. (A) simple ordinary least squares (OLS) model; (B) simple conditional autoregressive (CAR) model; (C) the simultaneous autoregressive in (SAR) model.

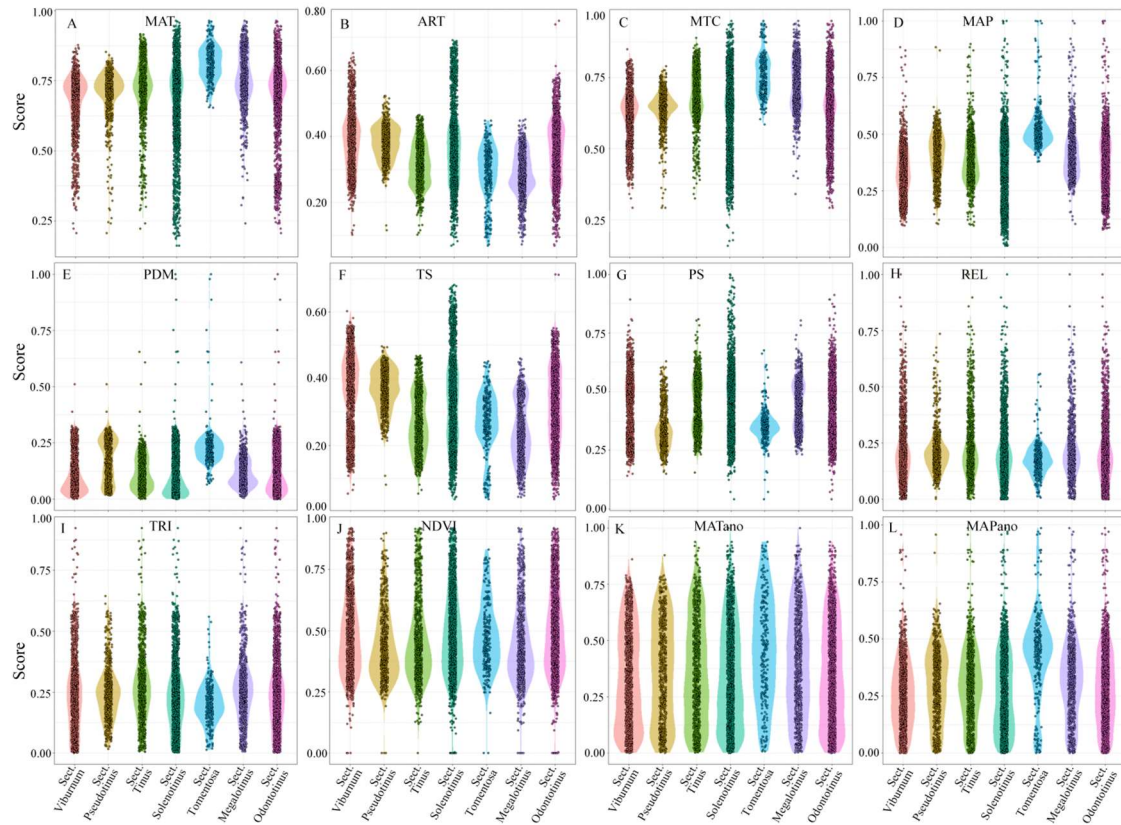

**Figure S5.** Magnitude of variation in each of the explanatory factors for the richness of seven sections of endemic of genus *Viburnum* in China. (A)(A) Mean annual temperature (MAT); (B) Annual range of temperature (ART); (C) Mean temperature of the coldest quarter (MTC); (D) Mean annual precipitation (MAP); (E) Mean precipitation of the driest month (PDM); (F) temperature seasonality (TS); (G) Precipitation seasonality (PS); (H) The range in elevation of each grid cell (maximum minus minimum elevation, REL); (I) Terrain ruggedness index (TRI); (J) Normalized difference vegetation index (NDVI); (K) MAT change since the Last Glacial Maximum (MATano); (L) MAP change since the Last Glacial Maximum(MAPano).
